# Supplementary material for: The role of GLI1 for 5-Fu resistance in colorectal cancer
Source: PubMed Central journal article supplement (PMC5390459; doi:10.1186/s13578-017-0145-7), 2017-04-13

## Supplementary information

### Exome sequencing identifies a novel mechanism for 5-Fu resistance in colorectal cancer-

Lining Zhang<sup>1</sup>, Ruolan Song<sup>1,2</sup>, Dongsheng Gu<sup>2</sup>, Xiaoli Zhang<sup>2</sup>, Beiqin Yu<sup>1</sup>, Bingya Liu<sup>1,\*</sup>, Jingwu Xie<sup>2,\*</sup>

<sup>1</sup>Shanghai Key Laboratory of Gastric Neoplasms, Shanghai Institute of Digestive Surgery, Ruijin Hospital, Shanghai Jiao Tong University School of Medicine, Shanghai 200025, China

<sup>2</sup>Departments of Pediatrics, Biochemistry and Molecular Biology, Pharmacology and Toxicology, The Wells Center for Pediatrics Research and IU Simon Cancer Center, Indiana University School of Medicine, Indianapolis, IN 46202, USA.

\*Correspondence address. Jingwu Xie, E-mail: [jinxie@iu.edu](mailto:jinxie@iu.edu); Bingya Liu, Email: [liubingya@sjtu.edu.cn](mailto:liubingya@sjtu.edu.cn)

Email addresses for all authors: Lining Zhang- [zln629@163.com](mailto:zln629@163.com); Ruolan Song- [ruolsong@iu.edu](mailto:ruolsong@iu.edu); Dongsheng Gu- [donggu@iu.edu](mailto:donggu@iu.edu); Xiaoli Zhang- [zhang86@iu.edu](mailto:zhang86@iu.edu); Beiqin Yu- [yubeiqin@126.com](mailto:yubeiqin@126.com); Bingya Liu- [liubingya@sjtu.edu.cn](mailto:liubingya@sjtu.edu.cn); Jingwu Xie- [jinxie@iu.edu](mailto:jinxie@iu.edu)

## Supplementary figures from IPA analyses

### Supplementary figure 1- Signaling networks

Network 2 : LoVo genes-20160714new-list - 2016-07-13 09:23 AM : LoVo genes-20160714new-list : LoVo genes-20160714new-list - 2016-07-13 09:23 AM

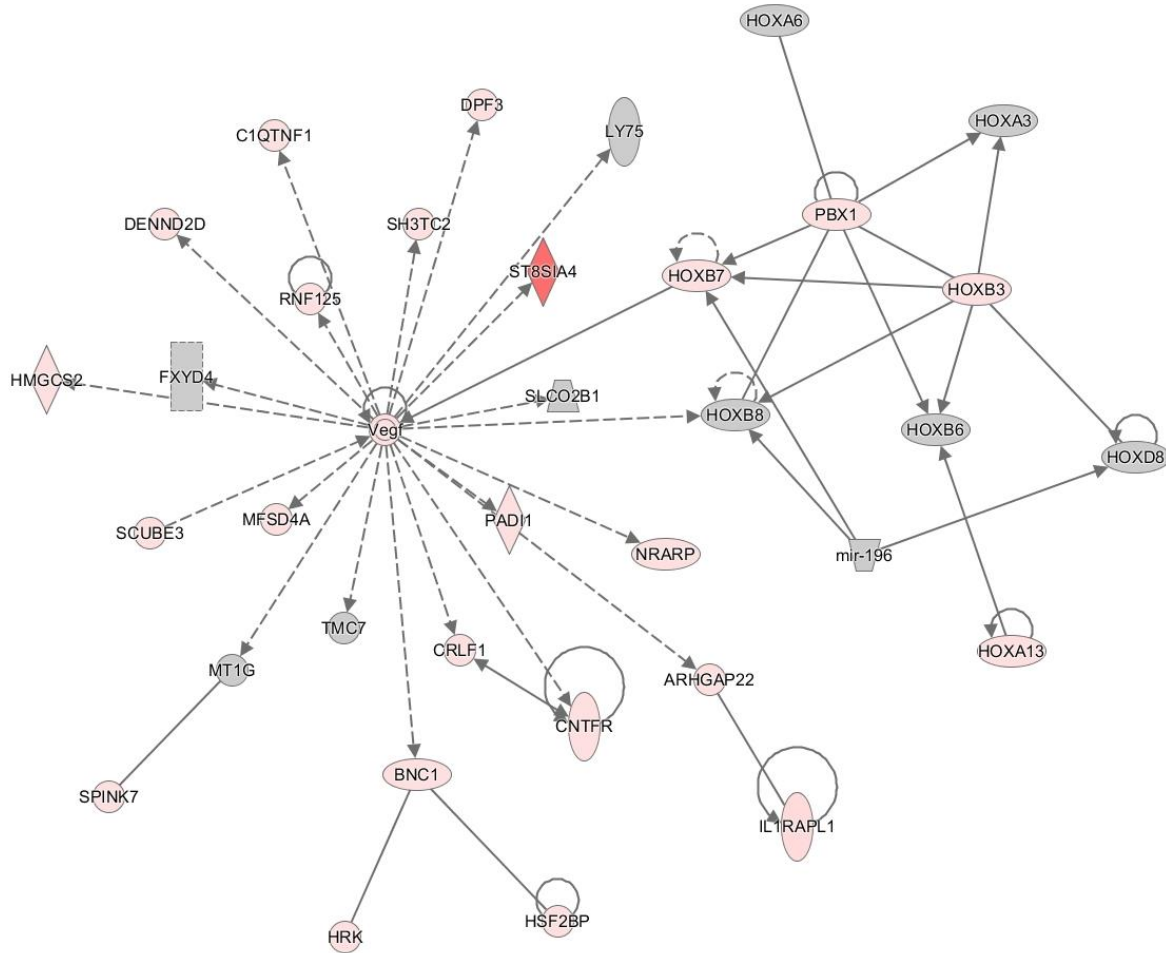

## Supplementary figure 2- Signaling networks

Network 9 : LoVo genes-20160714new-list - 2016-07-13 09:23 AM : LoVo genes-20160714new-list : LoVo genes-20160714new-list - 2016-07-13 09:23 AM

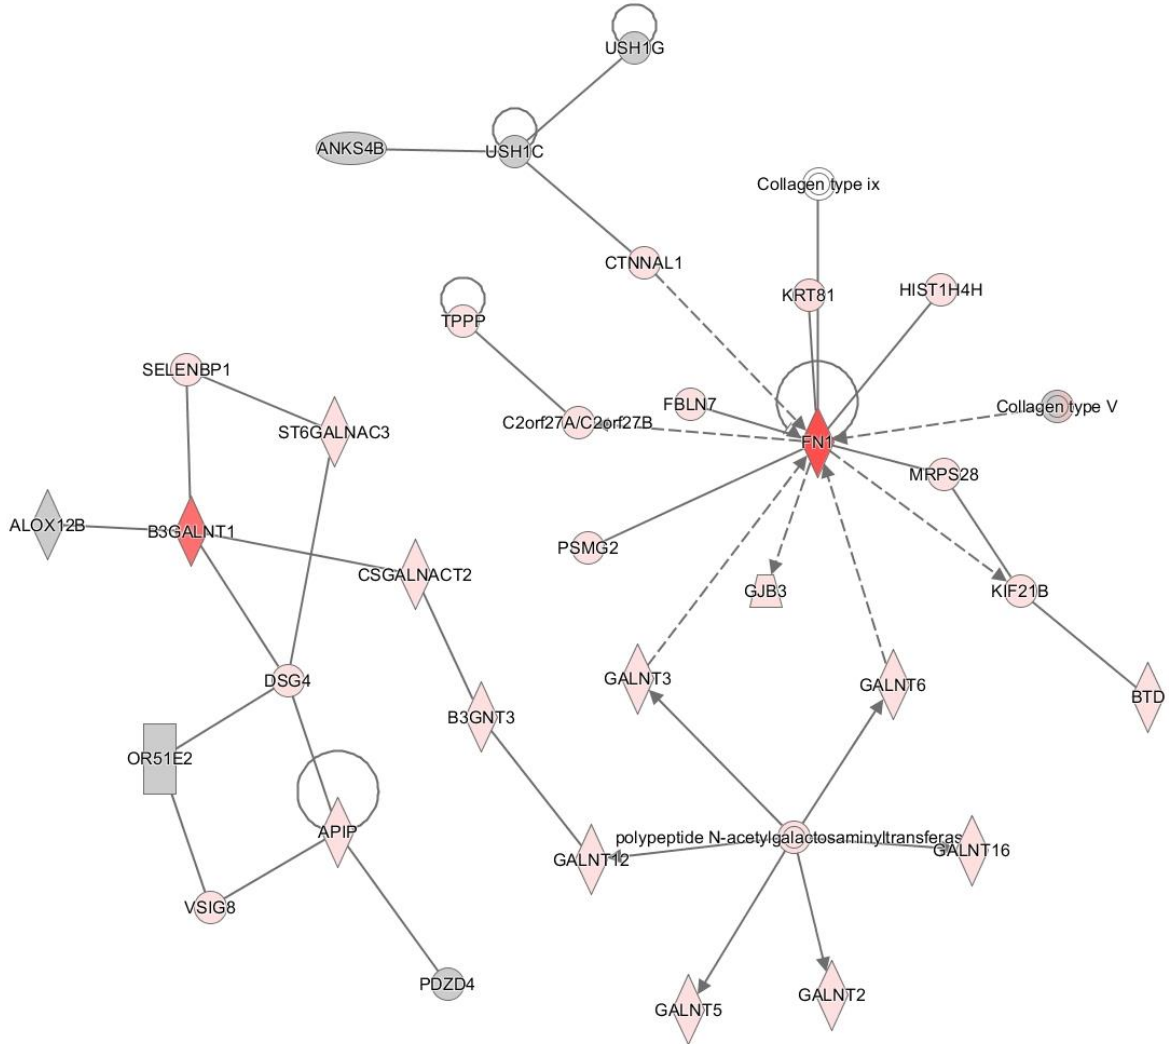

### Supplementary figure 3- Signaling networks

Network 17 : LoVo genes-20160714new-list - 2016-07-13 09:23 AM : LoVo genes-20160714new-list : LoVo genes-20160714new-list - 2016-07-13 09:23 AM

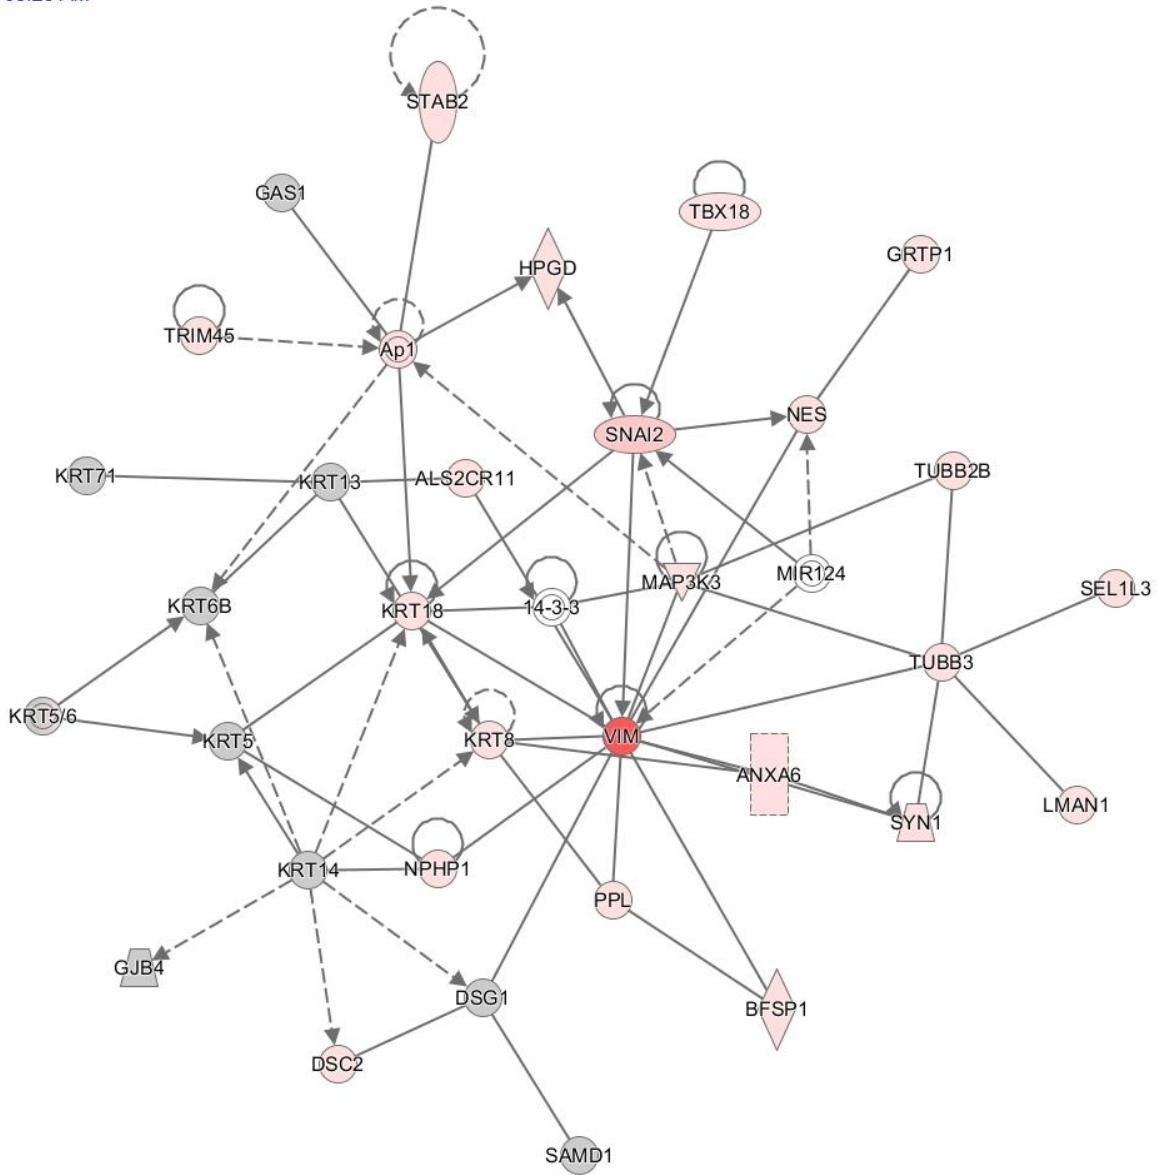

## Supplementary figure 4- Signaling networks

Network 20 : LoVo genes-20160714new-list - 2016-07-13 09:23 AM : LoVo genes-20160714new-list : LoVo genes-20160714new-list - 2016-07-13 09:23 AM

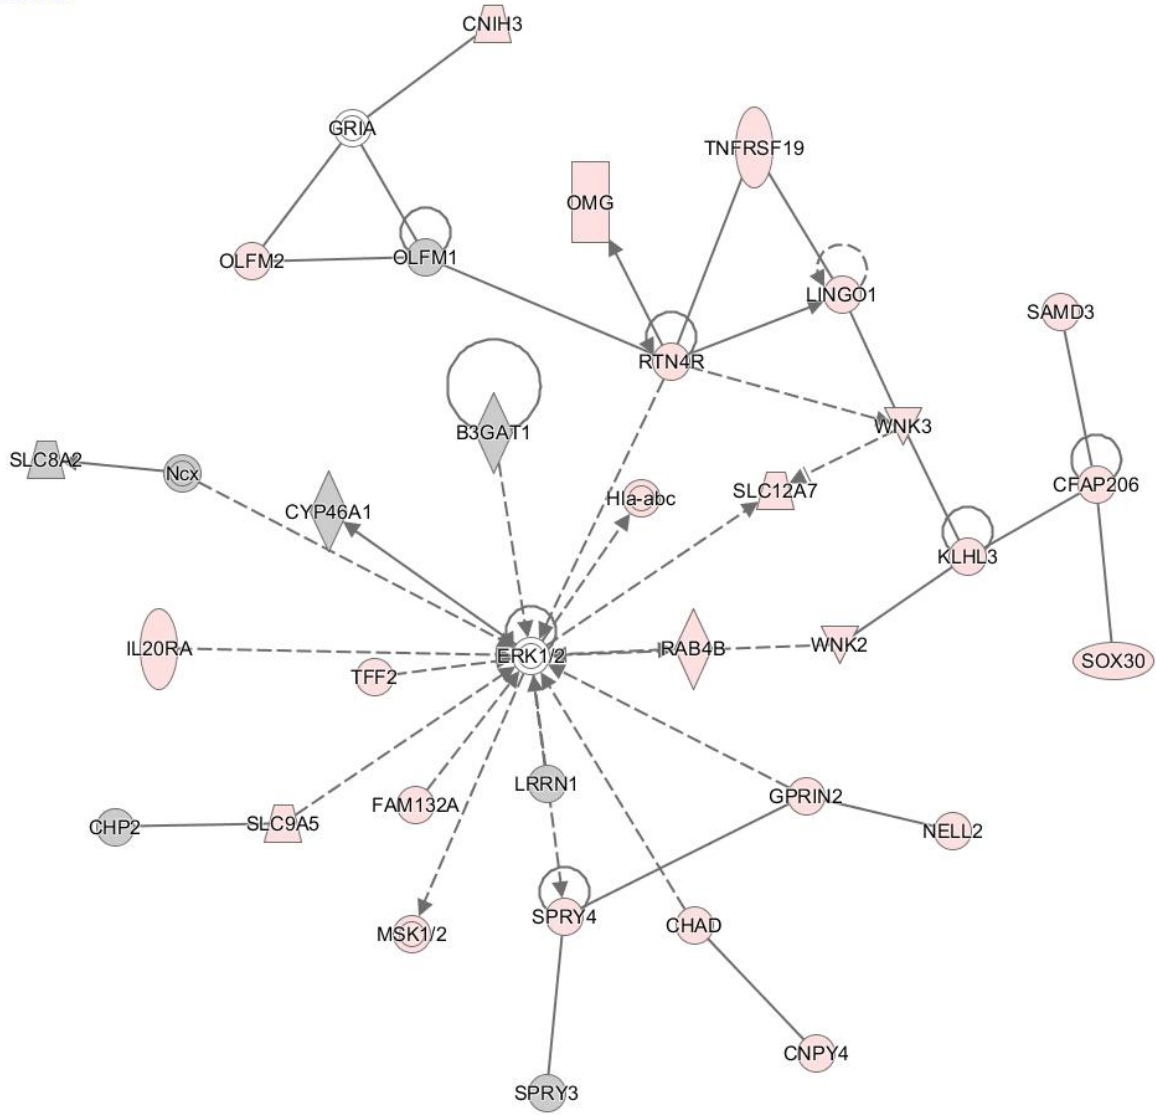

## Supplementary figure 5- Signaling networks

Network 23 : LoVo genes-20160714new-list - 2016-07-13 09:23 AM : LoVo genes-20160714new-list : LoVo genes-20160714new-list - 2016-07-13 09:23 AM

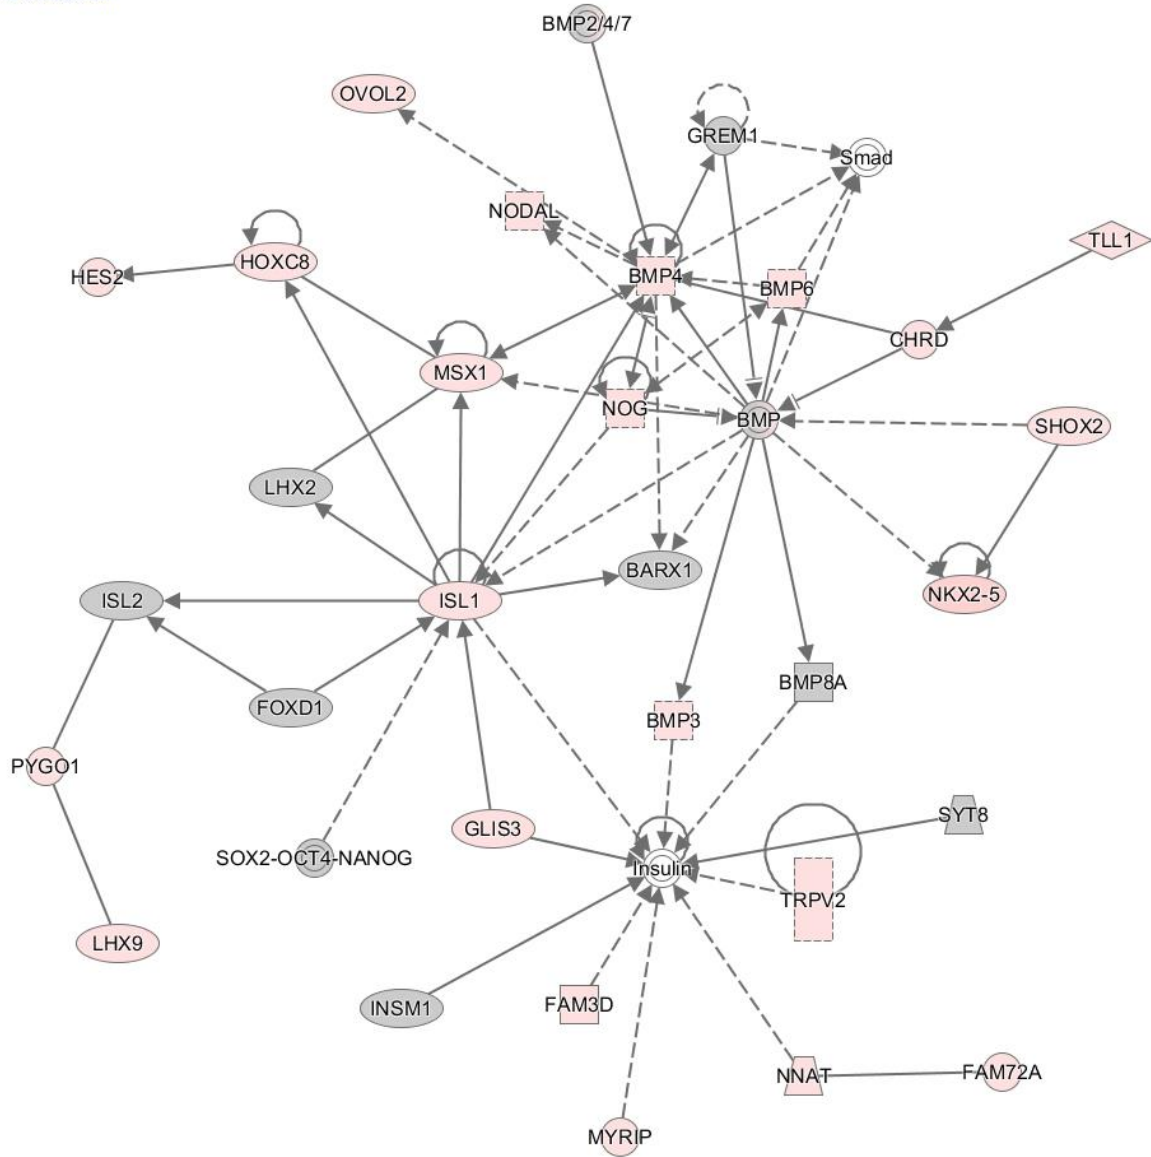

Supplement: 13578_2017_145_MOESM1_ESM.pdf [file 13578_2017_145_MOESM1_ESM.pdf]
