# Supplementary material for: The role of GLI1 for 5-Fu resistance in colorectal cancer
Source: PubMed Central journal article supplement (PMC5390459; doi:10.1186/s13578-017-0145-7), 2017-04-13
Supplement: 13578_2017_145_MOESM2_ESM.pdf [file 13578_2017_145_MOESM2_ESM.pdf]

<html><head></head><body><pre style="word-wrap: break-word; white-space: pre-wrap;">Disease Free Survival Kaplan-Meier Estimate

Cases with Alteration(s) in Query Gene(s)

| Case ID      | Number at Risk | Status   | Survival Rate      | Time (months) |
|--------------|----------------|----------|--------------------|---------------|
| TCGA-AA-3712 | 108            | censored | 1                  | 0             |
| TCGA-AY-6196 | 107            | censored | 1                  | 0.2           |
| TCGA-AM-5821 | 106            | censored | 1                  | 0.92          |
| TCGA-CM-5862 | 105            | relapsed | 0.9904761904761905 | 1.02          |
| TCGA-F4-6704 | 104            | censored | 0.9904761904761905 | 1.54          |
| TCGA-CK-6748 | 103            | censored | 0.9904761904761905 | 2             |
| TCGA-F5-6813 | 102            | relapsed | 0.9807656395891691 | 2.14          |
| TCGA-NH-A6GA | 101            | relapsed | 0.9710550887021476 | 3.48          |
| TCGA-4N-A93T | 100            | censored | 0.9710550887021476 | 4.8           |
| TCGA-CI-6619 | 99             | censored | 0.9710550887021476 | 6.04          |
| TCGA-CA-6718 | 98             | relapsed | 0.9611463633072277 | 6.8           |
| TCGA-5M-AAT6 | 97             | relapsed | 0.9512376379123079 | 7.19          |
| TCGA-EI-7004 | 96             | censored | 0.9512376379123079 | 8.44          |
| TCGA-A6-A566 | 95             | relapsed | 0.9412246101448098 | 8.44          |
| TCGA-EI-6882 | 94             | censored | 0.9412246101448098 | 8.61          |
| TCGA-D5-6927 | 93             | censored | 0.9412246101448098 | 9.43          |
| TCGA-CM-6679 | 92             | censored | 0.9412246101448098 | 10.05         |
| TCGA-AA-A02K | 91             | relapsed | 0.9308814825608009 | 10.05         |
| TCGA-F4-6460 | 90             | relapsed | 0.920538354976792  | 10.28         |
| TCGA-DM-A288 | 89             | relapsed | 0.9101952273927831 | 10.51         |
| TCGA-AD-6964 | 88             | relapsed | 0.8998520998087742 | 10.68         |
| TCGA-CM-6172 | 87             | censored | 0.8998520998087742 | 11.01         |
| TCGA-CM-5861 | 86             | relapsed | 0.8893887032993698 | 11.01         |
| TCGA-D5-6928 | 85             | censored | 0.8893887032993698 | 11.63         |
| TCGA-DC-6154 | 84             | censored | 0.8893887032993698 | 11.99         |
| TCGA-CM-6162 | 83             | censored | 0.8893887032993698 | 11.99         |
| TCGA-F5-6702 | 82             | relapsed | 0.878542499600597  | 12.09         |
| TCGA-CA-6716 | 81             | censored | 0.878542499600597  | 12.19         |
| TCGA-CA-5255 | 80             | censored | 0.878542499600597  | 12.35         |
| TCGA-CA-5796 | 79             | censored | 0.878542499600597  | 12.39         |
| TCGA-D5-6923 | 78             | censored | 0.878542499600597  | 12.42         |
| TCGA-F5-6864 | 77             | censored | 0.878542499600597  | 12.45         |
| TCGA-DT-5265 | 76             | censored | 0.878542499600597  | 12.61         |
| TCGA-D5-6529 | 75             | relapsed | 0.8668285996059224 | 12.68         |
| TCGA-NH-A6GC | 74             | censored | 0.8668285996059224 | 12.78         |
| TCGA-CM-6674 | 73             | censored | 0.8668285996059224 | 12.94         |
| TCGA-D5-6930 | 72             | censored | 0.8668285996059224 | 13.34         |
| TCGA-DC-6155 | 71             | censored | 0.8668285996059224 | 13.96         |
| TCGA-CM-6171 | 70             | censored | 0.8668285996059224 | 14.03         |
| TCGA-CM-6163 | 69             | censored | 0.8668285996059224 | 14.03         |
| TCGA-A6-A565 | 68             | relapsed | 0.854081120199953  | 14.42         |
| TCGA-CM-6167 | 67             | censored | 0.854081120199953  | 14.98         |
| TCGA-CK-4951 | 66             | relapsed | 0.8411404971666203 | 15.77         |
| TCGA-DM-A28H | 65             | relapsed | 0.8281998741332878 | 15.9          |
| TCGA-D5-6536 | 64             | relapsed | 0.8152592510999551 | 16.2          |
| TCGA-EI-6514 | 63             | censored | 0.8152592510999551 | 16.29         |
| TCGA-NH-A8F7 | 62             | censored | 0.8152592510999551 | 17.84         |
| TCGA-AY-A69D | 61             | censored | 0.8152592510999551 | 17.84         |
| TCGA-NH-A50T | 60             | censored | 0.8152592510999551 | 18.17         |
| TCGA-AA-3713 | 59             | censored | 0.8152592510999551 | 19.02         |
| TCGA-D5-5539 | 58             | relapsed | 0.8012030571154731 | 19.02         |
| TCGA-AY-A71X | 57             | censored | 0.8012030571154731 | 19.32         |
| TCGA-A6-6781 | 56             | censored | 0.8012030571154731 | 19.65         |
| TCGA-G4-6314 | 55             | relapsed | 0.7866357288042827 | 19.88         |
| TCGA-EI-6507 | 54             | censored | 0.7866357288042827 | 19.94         |
| TCGA-AF-6655 | 53             | censored | 0.7866357288042827 | 20.01         |
| TCGA-AF-6136 | 52             | relapsed | 0.7715081186349695 | 20.01         |
| TCGA-DM-A0XD | 51             | relapsed | 0.7563805084656563 | 20.27         |
| TCGA-EI-6506 | 50             | censored | 0.7563805084656563 | 20.53         |
| TCGA-A6-5664 | 49             | relapsed | 0.7409441715581939 | 21.12         |
| TCGA-BM-6198 | 48             | censored | 0.7409441715581939 | 21.22         |
| TCGA-AY-6197 | 47             | censored | 0.7409441715581939 | 21.42         |
| TCGA-A6-6142 | 46             | relapsed | 0.7248366895677985 | 21.48         |
| TCGA-A6-5662 | 45             | relapsed | 0.7087292075774029 | 21.71         |
| TCGA-A6-6651 | 44             | censored | 0.7087292075774029 | 21.75         |

|              |    |          |                     |        |
|--------------|----|----------|---------------------|--------|
| TCGA-QL-A97D | 43 | censored | 0.7087292075774029  | 21.88  |
| TCGA-CM-6166 | 42 | censored | 0.7087292075774029  | 21.98  |
| TCGA-G4-6321 | 41 | censored | 0.7087292075774029  | 22.08  |
| TCGA-CM-5348 | 40 | censored | 0.7087292075774029  | 22.96  |
| TCGA-A6-6654 | 39 | censored | 0.7087292075774029  | 23.85  |
| TCGA-A6-6649 | 38 | censored | 0.7087292075774029  | 24.15  |
| TCGA-A6-6652 | 37 | censored | 0.7087292075774029  | 24.67  |
| TCGA-AA-A01X | 36 | relapsed | 0.6890422851446972  | 25.99  |
| TCGA-5M-AATE | 35 | relapsed | 0.6693553627119916  | 26.61  |
| TCGA-AH-6644 | 34 | censored | 0.6693553627119916  | 27.53  |
| TCGA-A6-2685 | 33 | relapsed | 0.6490718668722343  | 31.14  |
| TCGA-CM-5860 | 32 | censored | 0.6490718668722343  | 32     |
| TCGA-F5-6811 | 31 | censored | 0.6490718668722343  | 32.16  |
| TCGA-AH-6643 | 30 | relapsed | 0.6274361379764931  | 33.71  |
| TCGA-AG-3591 | 29 | censored | 0.6274361379764931  | 34     |
| TCGA-F4-6805 | 28 | censored | 0.6274361379764931  | 34.4   |
| TCGA-F5-6571 | 27 | relapsed | 0.6041977624958822  | 34.79  |
| TCGA-AA-3502 | 26 | censored | 0.6041977624958822  | 34.99  |
| TCGA-A6-A567 | 25 | relapsed | 0.5800298519960468  | 35.12  |
| TCGA-F4-6856 | 24 | censored | 0.5800298519960468  | 35.28  |
| TCGA-F4-6569 | 23 | censored | 0.5800298519960468  | 35.71  |
| TCGA-AA-3685 | 22 | censored | 0.5800298519960468  | 37.02  |
| TCGA-F5-6814 | 21 | censored | 0.5800298519960468  | 37.16  |
| TCGA-F4-6806 | 20 | relapsed | 0.5510283593962445  | 37.19  |
| TCGA-D5-6534 | 19 | censored | 0.5510283593962445  | 43.23  |
| TCGA-AA-3675 | 18 | censored | 0.5510283593962445  | 47.01  |
| TCGA-F4-6855 | 17 | censored | 0.5510283593962445  | 47.37  |
| TCGA-F4-6703 | 16 | censored | 0.5510283593962445  | 47.83  |
| TCGA-SS-A7HO | 15 | relapsed | 0.5142931354364949  | 59.17  |
| TCGA-AA-3509 | 14 | censored | 0.5142931354364949  | 62.91  |
| TCGA-DM-A1D4 | 13 | relapsed | 0.47473212501830303 | 63.07  |
| TCGA-DM-A28C | 12 | relapsed | 0.4351711146001111  | 63.37  |
| TCGA-G4-6310 | 11 | censored | 0.4351711146001111  | 63.57  |
| TCGA-WS-AB45 | 10 | censored | 0.4351711146001111  | 69.97  |
| TCGA-G4-6309 | 9  | relapsed | 0.38681876853343206 | 71.48  |
| TCGA-G4-6299 | 8  | censored | 0.38681876853343206 | 74.51  |
| TCGA-AA-3660 | 7  | censored | 0.38681876853343206 | 78.02  |
| TCGA-CL-5917 | 6  | censored | 0.38681876853343206 | 78.06  |
| TCGA-DM-A28K | 5  | censored | 0.38681876853343206 | 98.16  |
| TCGA-DY-A1DE | 4  | relapsed | 0.29011407640007403 | 108.94 |
| TCGA-DM-A1HA | 3  | censored | 0.29011407640007403 | 131.41 |
| TCGA-DM-A1HB | 2  | censored | 0.29011407640007403 | 135.55 |
| TCGA-DM-A1D9 | 1  | censored | 0.29011407640007403 | 140.28 |

Cases without Alteration(s) in Query Gene(s)

| Case ID Number | at Risk | Status   | Survival Rate      | Time (months) |
|----------------|---------|----------|--------------------|---------------|
| TCGA-AG-4021   | 434     | relapsed | 0.9976958525345622 | 0             |
| TCGA-AA-3814   | 433     | censored | 0.9976958525345622 | 0             |
| TCGA-AA-3527   | 432     | censored | 0.9976958525345622 | 0             |
| TCGA-AA-3872   | 431     | censored | 0.9976958525345622 | 0             |
| TCGA-AG-A01L   | 430     | censored | 0.9976958525345622 | 0             |
| TCGA-AG-A01Y   | 429     | censored | 0.9976958525345622 | 0             |
| TCGA-AG-A01W   | 428     | censored | 0.9976958525345622 | 0             |
| TCGA-AA-3984   | 427     | censored | 0.9976958525345622 | 0             |
| TCGA-AA-3684   | 426     | censored | 0.9976958525345622 | 0             |
| TCGA-AG-3601   | 425     | censored | 0.9976958525345622 | 0             |
| TCGA-AG-3602   | 424     | censored | 0.9976958525345622 | 0             |
| TCGA-CM-6678   | 423     | relapsed | 0.9953372334978374 | 0             |
| TCGA-AA-3695   | 422     | censored | 0.9953372334978374 | 0             |
| TCGA-AA-3693   | 421     | censored | 0.9953372334978374 | 0             |
| TCGA-CK-5915   | 420     | censored | 0.9953372334978374 | 0             |
| TCGA-AD-A5EJ   | 419     | censored | 0.9953372334978374 | 0             |
| TCGA-AA-A022   | 418     | censored | 0.9953372334978374 | 0             |
| TCGA-AM-5820   | 417     | censored | 0.9953372334978374 | 0.46          |
| TCGA-F4-6854   | 416     | censored | 0.9953372334978374 | 0.53          |
| TCGA-CK-4947   | 415     | relapsed | 0.9929388305255535 | 0.69          |
| TCGA-AA-3672   | 414     | censored | 0.9929388305255535 | 0.92          |
| TCGA-AA-A020   | 413     | censored | 0.9929388305255535 | 0.92          |
| TCGA-DC-6156   | 412     | relapsed | 0.9905287848203944 | 0.99          |
| TCGA-AA-3856   | 411     | censored | 0.9905287848203944 | 0.99          |
| TCGA-AA-3543   | 410     | censored | 0.9905287848203944 | 0.99          |
| TCGA-AG-3727   | 409     | censored | 0.9905287848203944 | 0.99          |

|              |     |          |                    |       |
|--------------|-----|----------|--------------------|-------|
| TCGA-AG-3727 | 409 | censored | 0.9905287848203944 | 0.99  |
| TCGA-AG-3605 | 408 | censored | 0.9905287848203944 | 0.99  |
| TCGA-AG-3742 | 407 | censored | 0.9905287848203944 | 0.99  |
| TCGA-AG-3878 | 406 | censored | 0.9905287848203944 | 0.99  |
| TCGA-AA-A00R | 405 | censored | 0.9905287848203944 | 0.99  |
| TCGA-AG-4007 | 404 | censored | 0.9905287848203944 | 1.02  |
| TCGA-AA-3821 | 403 | censored | 0.9905287848203944 | 1.02  |
| TCGA-AA-3514 | 402 | censored | 0.9905287848203944 | 1.02  |
| TCGA-AG-A01J | 401 | censored | 0.9905287848203944 | 1.02  |
| TCGA-AA-3518 | 400 | censored | 0.9905287848203944 | 1.02  |
| TCGA-AG-A020 | 399 | censored | 0.9905287848203944 | 1.02  |
| TCGA-AA-3496 | 398 | censored | 0.9905287848203944 | 1.02  |
| TCGA-AA-3494 | 397 | censored | 0.9905287848203944 | 1.02  |
| TCGA-AG-3586 | 396 | censored | 0.9905287848203944 | 1.02  |
| TCGA-AG-3883 | 395 | censored | 0.9905287848203944 | 1.02  |
| TCGA-AA-A01Q | 394 | censored | 0.9905287848203944 | 1.02  |
| TCGA-AA-A01S | 393 | censored | 0.9905287848203944 | 1.02  |
| TCGA-AA-A01V | 392 | censored | 0.9905287848203944 | 1.02  |
| TCGA-AG-3896 | 391 | censored | 0.9905287848203944 | 1.02  |
| TCGA-AA-3511 | 390 | relapsed | 0.987988967423419  | 1.94  |
| TCGA-AA-3966 | 389 | censored | 0.987988967423419  | 2     |
| TCGA-T9-A92H | 388 | relapsed | 0.9854426041053175 | 2.66  |
| TCGA-EI-6509 | 387 | relapsed | 0.9828962407872159 | 2.96  |
| TCGA-CI-6620 | 386 | relapsed | 0.9803498774691143 | 2.96  |
| TCGA-AA-3555 | 385 | relapsed | 0.9778035141510127 | 2.99  |
| TCGA-AA-3558 | 384 | relapsed | 0.9752571508329112 | 3.02  |
| TCGA-G5-6233 | 383 | relapsed | 0.9727107875148095 | 3.02  |
| TCGA-EF-5830 | 382 | censored | 0.9727107875148095 | 3.48  |
| TCGA-AA-3552 | 381 | relapsed | 0.970157740828419  | 4.01  |
| TCGA-AG-A00Y | 380 | relapsed | 0.9676046941420284 | 4.04  |
| TCGA-D5-6537 | 379 | relapsed | 0.9650516474556379 | 4.04  |
| TCGA-EF-5831 | 378 | censored | 0.9650516474556379 | 4.17  |
| TCGA-AA-3715 | 377 | relapsed | 0.9624918287621216 | 5.03  |
| TCGA-DM-A1D7 | 376 | relapsed | 0.9599320100686053 | 5.06  |
| TCGA-AA-3681 | 375 | censored | 0.9599320100686053 | 5.98  |
| TCGA-AG-A00C | 374 | censored | 0.9599320100686053 | 6.01  |
| TCGA-AA-A01D | 373 | relapsed | 0.9573584658056867 | 6.01  |
| TCGA-AA-3662 | 372 | censored | 0.9573584658056867 | 6.04  |
| TCGA-AG-3600 | 371 | censored | 0.9573584658056867 | 6.04  |
| TCGA-AY-4070 | 370 | relapsed | 0.9547710104926984 | 6.11  |
| TCGA-F5-6863 | 369 | relapsed | 0.9521835551797101 | 6.27  |
| TCGA-AA-3663 | 368 | censored | 0.9521835551797101 | 6.96  |
| TCGA-AG-3581 | 367 | censored | 0.9521835551797101 | 7.06  |
| TCGA-CL-5918 | 366 | censored | 0.9521835551797101 | 7.16  |
| TCGA-D5-6898 | 365 | censored | 0.9521835551797101 | 7.52  |
| TCGA-AG-3726 | 364 | censored | 0.9521835551797101 | 7.98  |
| TCGA-CM-4750 | 363 | censored | 0.9521835551797101 | 8.02  |
| TCGA-AG-3580 | 362 | censored | 0.9521835551797101 | 8.02  |
| TCGA-AA-3525 | 361 | censored | 0.9521835551797101 | 8.05  |
| TCGA-G4-6295 | 360 | censored | 0.9521835551797101 | 8.34  |
| TCGA-A6-6141 | 359 | censored | 0.9521835551797101 | 8.38  |
| TCGA-RU-A8FL | 358 | relapsed | 0.9495238245786495 | 8.41  |
| TCGA-D5-6926 | 357 | censored | 0.9495238245786495 | 9.03  |
| TCGA-AA-3519 | 356 | censored | 0.9495238245786495 | 9.07  |
| TCGA-NH-A50U | 355 | relapsed | 0.9468491095798364 | 9.07  |
| TCGA-AG-A016 | 354 | censored | 0.9468491095798364 | 9.07  |
| TCGA-F4-6461 | 353 | relapsed | 0.9441668174847093 | 9.46  |
| TCGA-G4-6298 | 352 | relapsed | 0.9414845253895824 | 9.56  |
| TCGA-CK-5916 | 351 | relapsed | 0.9388022332944554 | 9.59  |
| TCGA-A6-A5ZU | 350 | censored | 0.9388022332944554 | 9.63  |
| TCGA-EI-6885 | 349 | relapsed | 0.9361122555486261 | 9.69  |
| TCGA-A6-2683 | 348 | relapsed | 0.9334222778027967 | 9.86  |
| TCGA-AZ-5403 | 347 | relapsed | 0.9307323000569673 | 9.99  |
| TCGA-D5-6922 | 346 | censored | 0.9307323000569673 | 10.12 |
| TCGA-D5-7000 | 345 | censored | 0.9307323000569673 | 10.25 |
| TCGA-AF-2692 | 344 | relapsed | 0.9280266829056388 | 10.74 |
| TCGA-EI-6884 | 343 | censored | 0.9280266829056388 | 10.78 |
| TCGA-CM-6676 | 342 | censored | 0.9280266829056388 | 11.07 |
| TCGA-CM-6677 | 341 | censored | 0.9280266829056388 | 11.07 |
| TCGA-CM-6675 | 340 | relapsed | 0.9252971926617988 | 11.07 |
| TCGA-AD-6888 | 339 | relapsed | 0.9225677024179586 | 11.27 |
| TCGA-D5-6932 | 338 | censored | 0.9225677024179586 | 11.37 |

|              |     |          |                    |       |
|--------------|-----|----------|--------------------|-------|
| TCGA-D5-6932 | 338 | censored | 0.9225677024179586 | 11.37 |
| TCGA-EI-6883 | 337 | censored | 0.9225677024179586 | 11.5  |
| TCGA-CA-6719 | 336 | relapsed | 0.9198219652083813 | 11.63 |
| TCGA-AF-A56N | 335 | censored | 0.9198219652083813 | 11.83 |
| TCGA-EI-7002 | 334 | censored | 0.9198219652083813 | 11.96 |
| TCGA-A6-4105 | 333 | relapsed | 0.9170597370846324 | 11.96 |
| TCGA-AA-3844 | 332 | relapsed | 0.9142975089608835 | 11.99 |
| TCGA-D5-6931 | 331 | censored | 0.9142975089608835 | 11.99 |
| TCGA-AG-3575 | 330 | censored | 0.9142975089608835 | 11.99 |
| TCGA-AA-A01G | 329 | censored | 0.9142975089608835 | 11.99 |
| TCGA-AG-3599 | 328 | censored | 0.9142975089608835 | 12.02 |
| TCGA-CM-6680 | 327 | censored | 0.9142975089608835 | 12.02 |
| TCGA-AD-5900 | 326 | censored | 0.9142975089608835 | 12.16 |
| TCGA-D5-6920 | 325 | censored | 0.9142975089608835 | 12.39 |
| TCGA-CA-5256 | 324 | censored | 0.9142975089608835 | 12.45 |
| TCGA-D5-6539 | 323 | censored | 0.9142975089608835 | 12.48 |
| TCGA-A6-2682 | 322 | relapsed | 0.911458075703241  | 12.52 |
| TCGA-CA-6715 | 321 | censored | 0.911458075703241  | 12.58 |
| TCGA-CA-5797 | 320 | censored | 0.911458075703241  | 12.58 |
| TCGA-4T-AA8H | 319 | censored | 0.911458075703241  | 12.65 |
| TCGA-CA-5254 | 318 | censored | 0.911458075703241  | 12.68 |
| TCGA-CA-6717 | 317 | censored | 0.911458075703241  | 12.75 |
| TCGA-NH-A6GC | 316 | censored | 0.911458075703241  | 12.78 |
| TCGA-AA-3867 | 315 | relapsed | 0.9085645580025958 | 12.94 |
| TCGA-AA-3939 | 314 | censored | 0.9085645580025958 | 12.98 |
| TCGA-AA-3542 | 313 | censored | 0.9085645580025958 | 12.98 |
| TCGA-CM-6168 | 312 | censored | 0.9085645580025958 | 12.98 |
| TCGA-AA-3842 | 311 | relapsed | 0.9056431285556422 | 13.01 |
| TCGA-AY-A54L | 310 | relapsed | 0.9027216991086886 | 13.01 |
| TCGA-CM-4752 | 309 | censored | 0.9027216991086886 | 13.01 |
| TCGA-AA-3692 | 308 | relapsed | 0.8997907845011929 | 13.01 |
| TCGA-CM-6169 | 307 | censored | 0.8997907845011929 | 13.01 |
| TCGA-AG-3892 | 306 | censored | 0.8997907845011929 | 13.01 |
| TCGA-AA-3973 | 305 | censored | 0.8997907845011929 | 13.04 |
| TCGA-D5-6929 | 304 | censored | 0.8997907845011929 | 13.4  |
| TCGA-AZ-4684 | 303 | relapsed | 0.8968211779516839 | 13.5  |
| TCGA-G4-6323 | 302 | censored | 0.8968211779516839 | 13.76 |
| TCGA-CI-6621 | 301 | censored | 0.8968211779516839 | 13.76 |
| TCGA-AA-3561 | 300 | censored | 0.8968211779516839 | 13.93 |
| TCGA-AG-A008 | 299 | censored | 0.8968211779516839 | 13.93 |
| TCGA-AG-3611 | 298 | censored | 0.8968211779516839 | 13.93 |
| TCGA-AA-A004 | 297 | censored | 0.8968211779516839 | 13.93 |
| TCGA-AA-3544 | 296 | censored | 0.8968211779516839 | 13.99 |
| TCGA-AA-3667 | 295 | censored | 0.8968211779516839 | 13.99 |
| TCGA-AG-3894 | 294 | censored | 0.8968211779516839 | 13.99 |
| TCGA-AG-4005 | 293 | censored | 0.8968211779516839 | 14.03 |
| TCGA-D5-6924 | 292 | censored | 0.8968211779516839 | 14.29 |
| TCGA-AU-3779 | 291 | censored | 0.8968211779516839 | 14.49 |
| TCGA-AA-A00W | 290 | censored | 0.8968211779516839 | 14.98 |
| TCGA-CM-6170 | 289 | censored | 0.8968211779516839 | 15.01 |
| TCGA-CM-5864 | 288 | censored | 0.8968211779516839 | 15.01 |
| TCGA-CM-5863 | 287 | censored | 0.8968211779516839 | 15.01 |
| TCGA-AA-3679 | 286 | censored | 0.8968211779516839 | 15.01 |
| TCGA-CM-6161 | 285 | censored | 0.8968211779516839 | 15.01 |
| TCGA-AA-A01C | 284 | censored | 0.8968211779516839 | 15.01 |
| TCGA-AA-A017 | 283 | censored | 0.8968211779516839 | 15.01 |
| TCGA-D5-6535 | 282 | censored | 0.8968211779516839 | 15.11 |
| TCGA-AF-6672 | 281 | relapsed | 0.8936296435105747 | 15.14 |
| TCGA-AD-6901 | 280 | relapsed | 0.8904381090694655 | 15.37 |
| TCGA-D5-6541 | 279 | censored | 0.8904381090694655 | 15.57 |
| TCGA-CK-4952 | 278 | censored | 0.8904381090694655 | 15.6  |
| TCGA-NH-A6GB | 277 | censored | 0.8904381090694655 | 15.64 |
| TCGA-EI-6511 | 276 | censored | 0.8904381090694655 | 15.83 |
| TCGA-AA-3833 | 275 | censored | 0.8904381090694655 | 15.93 |
| TCGA-AG-A014 | 274 | censored | 0.8904381090694655 | 15.93 |
| TCGA-AG-3608 | 273 | censored | 0.8904381090694655 | 15.93 |
| TCGA-CM-6165 | 272 | censored | 0.8904381090694655 | 16.03 |
| TCGA-AA-3971 | 271 | censored | 0.8904381090694655 | 16.06 |
| TCGA-D5-6540 | 270 | censored | 0.8904381090694655 | 16.13 |
| TCGA-EI-6513 | 269 | censored | 0.8904381090694655 | 16.33 |
| TCGA-EI-6881 | 268 | censored | 0.8904381090694655 | 16.39 |
| TCGA-AD-A5EK | 267 | censored | 0.8904381090694655 | 16.43 |

|              |     |          |                    |       |
|--------------|-----|----------|--------------------|-------|
| TCGA-G4-6294 | 266 | relapsed | 0.8870905973812344 | 16.98 |
| TCGA-AG-4008 | 265 | censored | 0.8870905973812344 | 17.02 |
| TCGA-AA-3846 | 264 | censored | 0.8870905973812344 | 17.02 |
| TCGA-AA-3866 | 263 | censored | 0.8870905973812344 | 17.02 |
| TCGA-CM-5868 | 262 | censored | 0.8870905973812344 | 17.02 |
| TCGA-AG-A015 | 261 | relapsed | 0.883691782831881  | 17.02 |
| TCGA-AG-3890 | 260 | censored | 0.883691782831881  | 17.02 |
| TCGA-AA-A00U | 259 | censored | 0.883691782831881  | 17.02 |
| TCGA-D5-6538 | 258 | censored | 0.883691782831881  | 17.12 |
| TCGA-A6-5665 | 257 | relapsed | 0.8802532934045196 | 17.38 |
| TCGA-EI-6917 | 256 | censored | 0.8802532934045196 | 17.44 |
| TCGA-AH-6549 | 255 | censored | 0.8802532934045196 | 17.48 |
| TCGA-EI-6512 | 254 | censored | 0.8802532934045196 | 17.67 |
| TCGA-D5-6531 | 253 | censored | 0.8802532934045196 | 17.74 |
| TCGA-AY-6386 | 252 | censored | 0.8802532934045196 | 17.81 |
| TCGA-NH-A8F7 | 251 | censored | 0.8802532934045196 | 17.84 |
| TCGA-AA-3554 | 250 | censored | 0.8802532934045196 | 17.94 |
| TCGA-AG-3885 | 249 | censored | 0.8802532934045196 | 17.94 |
| TCGA-AA-3831 | 248 | censored | 0.8802532934045196 | 17.97 |
| TCGA-AG-3891 | 247 | censored | 0.8802532934045196 | 18    |
| TCGA-AA-3875 | 246 | censored | 0.8802532934045196 | 18.04 |
| TCGA-AA-A00J | 245 | censored | 0.8802532934045196 | 18.04 |
| TCGA-AA-A00K | 244 | censored | 0.8802532934045196 | 18.04 |
| TCGA-D5-6532 | 243 | censored | 0.8802532934045196 | 18.23 |
| TCGA-EI-6510 | 242 | censored | 0.8802532934045196 | 18.27 |
| TCGA-AY-A8YK | 241 | censored | 0.8802532934045196 | 18.82 |
| TCGA-AG-A02G | 240 | relapsed | 0.8765855713486674 | 18.99 |
| TCGA-AA-3688 | 239 | censored | 0.8765855713486674 | 18.99 |
| TCGA-AA-A00D | 238 | censored | 0.8765855713486674 | 18.99 |
| TCGA-AG-3881 | 237 | censored | 0.8765855713486674 | 19.02 |
| TCGA-AA-3526 | 236 | censored | 0.8765855713486674 | 19.05 |
| TCGA-AA-3986 | 235 | censored | 0.8765855713486674 | 19.05 |
| TCGA-AA-3530 | 234 | censored | 0.8765855713486674 | 19.05 |
| TCGA-NH-A5IV | 233 | censored | 0.8765855713486674 | 19.32 |
| TCGA-NH-A50V | 232 | censored | 0.8765855713486674 | 19.32 |
| TCGA-AH-6903 | 231 | censored | 0.8765855713486674 | 19.45 |
| TCGA-G4-6317 | 230 | relapsed | 0.8727743297341081 | 19.45 |
| TCGA-DY-A1DG | 229 | relapsed | 0.8689630881195486 | 19.45 |
| TCGA-AG-3909 | 228 | censored | 0.8689630881195486 | 19.97 |
| TCGA-AA-3562 | 227 | censored | 0.8689630881195486 | 19.97 |
| TCGA-AA-3560 | 226 | censored | 0.8689630881195486 | 19.97 |
| TCGA-AG-3609 | 225 | censored | 0.8689630881195486 | 19.97 |
| TCGA-AG-3612 | 224 | censored | 0.8689630881195486 | 19.97 |
| TCGA-AG-3882 | 223 | censored | 0.8689630881195486 | 19.97 |
| TCGA-AA-A01R | 222 | relapsed | 0.8650488399748659 | 19.97 |
| TCGA-CM-4744 | 221 | censored | 0.8650488399748659 | 20.01 |
| TCGA-A6-6780 | 220 | censored | 0.8650488399748659 | 20.11 |
| TCGA-A6-6782 | 219 | censored | 0.8650488399748659 | 20.27 |
| TCGA-D5-6530 | 218 | censored | 0.8650488399748659 | 20.4  |
| TCGA-A6-6650 | 217 | censored | 0.8650488399748659 | 20.6  |
| TCGA-DY-A1DC | 216 | relapsed | 0.8610439842342416 | 20.7  |
| TCGA-EI-6508 | 215 | censored | 0.8610439842342416 | 20.89 |
| TCGA-AA-3955 | 214 | censored | 0.8610439842342416 | 20.96 |
| TCGA-AG-A002 | 213 | censored | 0.8610439842342416 | 20.96 |
| TCGA-AG-3725 | 212 | censored | 0.8610439842342416 | 20.96 |
| TCGA-AA-3549 | 211 | censored | 0.8610439842342416 | 20.99 |
| TCGA-DC-4745 | 210 | censored | 0.8610439842342416 | 20.99 |
| TCGA-AD-6965 | 209 | relapsed | 0.8569241565584796 | 21.29 |
| TCGA-AD-6548 | 208 | censored | 0.8569241565584796 | 21.35 |
| TCGA-AA-3968 | 207 | censored | 0.8569241565584796 | 21.98 |
| TCGA-CK-5914 | 206 | censored | 0.8569241565584796 | 21.98 |
| TCGA-AA-A00Z | 205 | censored | 0.8569241565584796 | 21.98 |
| TCGA-CM-5344 | 204 | censored | 0.8569241565584796 | 22.01 |
| TCGA-A6-6138 | 203 | censored | 0.8569241565584796 | 22.5  |
| TCGA-A6-6648 | 202 | relapsed | 0.8526819577636356 | 22.54 |
| TCGA-AZ-4615 | 201 | relapsed | 0.8484397589687918 | 22.6  |
| TCGA-AA-3556 | 200 | censored | 0.8484397589687918 | 23    |
| TCGA-CM-4743 | 199 | censored | 0.8484397589687918 | 23.03 |
| TCGA-D5-5537 | 198 | relapsed | 0.8441547096810705 | 23.72 |
| TCGA-AA-3950 | 197 | censored | 0.8441547096810705 | 23.98 |
| TCGA-AA-3941 | 196 | censored | 0.8441547096810705 | 23.98 |

|              |     |          |                    |       |
|--------------|-----|----------|--------------------|-------|
| TCGA-AA-3979 | 195 | censored | 0.8441547096810705 | 23.98 |
| TCGA-AA-3553 | 194 | censored | 0.8441547096810705 | 23.98 |
| TCGA-AA-3520 | 193 | censored | 0.8441547096810705 | 24.01 |
| TCGA-A6-6140 | 192 | censored | 0.8441547096810705 | 24.11 |
| TCGA-A6-6653 | 191 | censored | 0.8441547096810705 | 24.38 |
| TCGA-AD-6890 | 190 | censored | 0.8441547096810705 | 24.51 |
| TCGA-AA-3819 | 189 | censored | 0.8441547096810705 | 25    |
| TCGA-CM-4747 | 188 | censored | 0.8441547096810705 | 25    |
| TCGA-AG-3901 | 187 | censored | 0.8441547096810705 | 25    |
| TCGA-AA-3977 | 186 | censored | 0.8441547096810705 | 25    |
| TCGA-DC-6682 | 185 | censored | 0.8441547096810705 | 25.03 |
| TCGA-DC-6683 | 184 | censored | 0.8441547096810705 | 25.03 |
| TCGA-AA-3812 | 183 | relapsed | 0.8395418424150538 | 25.03 |
| TCGA-DC-4749 | 182 | censored | 0.8395418424150538 | 25.03 |
| TCGA-AA-A01P | 181 | relapsed | 0.8349034896945287 | 25.03 |
| TCGA-AD-6895 | 180 | censored | 0.8349034896945287 | 25.07 |
| TCGA-D5-6533 | 179 | censored | 0.8349034896945287 | 25.46 |
| TCGA-G4-6322 | 178 | relapsed | 0.830213020651301  | 25.92 |
| TCGA-DC-6681 | 177 | censored | 0.830213020651301  | 25.95 |
| TCGA-AG-A00H | 176 | relapsed | 0.8254959012157822 | 25.95 |
| TCGA-AA-3949 | 175 | censored | 0.8254959012157822 | 25.99 |
| TCGA-AA-3976 | 174 | censored | 0.8254959012157822 | 25.99 |
| TCGA-AA-3538 | 173 | censored | 0.8254959012157822 | 25.99 |
| TCGA-AG-3999 | 172 | relapsed | 0.8206965064412718 | 25.99 |
| TCGA-AG-A032 | 171 | relapsed | 0.8158971116667614 | 26.02 |
| TCGA-CM-4748 | 170 | censored | 0.8158971116667614 | 26.02 |
| TCGA-DC-5337 | 169 | censored | 0.8158971116667614 | 26.02 |
| TCGA-G4-6588 | 168 | censored | 0.8158971116667614 | 26.15 |
| TCGA-G4-6320 | 167 | censored | 0.8158971116667614 | 26.41 |
| TCGA-AH-6897 | 166 | censored | 0.8158971116667614 | 26.41 |
| TCGA-G5-6641 | 165 | censored | 0.8158971116667614 | 26.41 |
| TCGA-AA-3710 | 164 | censored | 0.8158971116667614 | 26.97 |
| TCGA-AA-3517 | 163 | relapsed | 0.8108916079142046 | 26.97 |
| TCGA-AA-3994 | 162 | censored | 0.8108916079142046 | 27    |
| TCGA-CM-4751 | 161 | censored | 0.8108916079142046 | 27    |
| TCGA-AG-A023 | 160 | relapsed | 0.8058235353647408 | 27    |
| TCGA-AA-3982 | 159 | censored | 0.8058235353647408 | 27    |
| TCGA-AA-A000 | 158 | censored | 0.8058235353647408 | 27    |
| TCGA-A6-6137 | 157 | censored | 0.8058235353647408 | 27.07 |
| TCGA-AU-6004 | 156 | censored | 0.8058235353647408 | 27.07 |
| TCGA-AD-6963 | 155 | censored | 0.8058235353647408 | 27.4  |
| TCGA-AF-3914 | 154 | relapsed | 0.8005909150052296 | 27.79 |
| TCGA-G4-6304 | 153 | relapsed | 0.7953582946457183 | 28.22 |
| TCGA-G4-6303 | 152 | relapsed | 0.790125674286207  | 28.65 |
| TCGA-AA-3532 | 151 | censored | 0.790125674286207  | 28.98 |
| TCGA-AA-3534 | 150 | censored | 0.790125674286207  | 28.98 |
| TCGA-CM-6164 | 149 | censored | 0.790125674286207  | 29.01 |
| TCGA-CM-5341 | 148 | censored | 0.790125674286207  | 29.04 |
| TCGA-A6-5667 | 147 | censored | 0.790125674286207  | 29.14 |
| TCGA-A6-5660 | 146 | censored | 0.790125674286207  | 29.17 |
| TCGA-QG-A5YW | 145 | censored | 0.790125674286207  | 29.43 |
| TCGA-AA-3870 | 144 | censored | 0.790125674286207  | 29.96 |
| TCGA-AF-4110 | 143 | censored | 0.790125674286207  | 29.96 |
| TCGA-AG-3728 | 142 | censored | 0.790125674286207  | 29.96 |
| TCGA-AA-A00E | 141 | censored | 0.790125674286207  | 29.99 |
| TCGA-AA-3862 | 140 | censored | 0.790125674286207  | 30.03 |
| TCGA-AA-3861 | 139 | censored | 0.790125674286207  | 30.03 |
| TCGA-CM-5349 | 138 | censored | 0.790125674286207  | 30.06 |
| TCGA-A6-5659 | 137 | censored | 0.790125674286207  | 30.42 |
| TCGA-AG-A01N | 136 | censored | 0.790125674286207  | 30.98 |
| TCGA-AA-3877 | 135 | censored | 0.790125674286207  | 30.98 |
| TCGA-DC-5869 | 134 | censored | 0.790125674286207  | 30.98 |
| TCGA-AA-A01I | 133 | censored | 0.790125674286207  | 30.98 |
| TCGA-AA-A01K | 132 | censored | 0.790125674286207  | 30.98 |
| TCGA-AA-3860 | 131 | censored | 0.790125674286207  | 31.04 |
| TCGA-AA-3858 | 130 | censored | 0.790125674286207  | 31.04 |
| TCGA-QG-A5Z2 | 129 | censored | 0.790125674286207  | 31.27 |
| TCGA-A6-5657 | 128 | censored | 0.790125674286207  | 31.6  |
| TCGA-A6-5666 | 127 | relapsed | 0.7839042122839533 | 31.87 |
| TCGA-AG-3902 | 126 | censored | 0.7839042122839533 | 32    |
| TCGA-AG-3578 | 125 | censored | 0.7839042122839533 | 32    |



|              |     |          |                    |       |
|--------------|-----|----------|--------------------|-------|
| TCGA-AA-A01F | 124 | censored | 0.7839042122839533 | 32    |
| TCGA-AA-3855 | 123 | censored | 0.7839042122839533 | 32.03 |
| TCGA-A6-2684 | 122 | relapsed | 0.7774787679209701 | 32.06 |
| TCGA-A6-4107 | 121 | censored | 0.7774787679209701 | 32.42 |
| TCGA-A6-3809 | 120 | censored | 0.7774787679209701 | 32.72 |
| TCGA-A6-5656 | 119 | censored | 0.7774787679209701 | 32.88 |
| TCGA-QG-A5YX | 118 | censored | 0.7774787679209701 | 32.95 |
| TCGA-AG-3732 | 117 | censored | 0.7774787679209701 | 32.95 |
| TCGA-G4-6627 | 116 | relapsed | 0.7707763647492377 | 32.95 |
| TCGA-AY-5543 | 115 | censored | 0.7707763647492377 | 32.98 |
| TCGA-AA-3947 | 114 | censored | 0.7707763647492377 | 32.98 |
| TCGA-AA-3815 | 113 | censored | 0.7707763647492377 | 33.02 |
| TCGA-AA-A02W | 112 | relapsed | 0.7638944329211196 | 33.02 |
| TCGA-AA-A01T | 111 | censored | 0.7638944329211196 | 33.02 |
| TCGA-AA-3851 | 110 | censored | 0.7638944329211196 | 33.05 |
| TCGA-D5-5538 | 109 | relapsed | 0.7568862271145038 | 33.08 |
| TCGA-A6-3808 | 108 | censored | 0.7568862271145038 | 33.31 |
| TCGA-A6-5661 | 107 | censored | 0.7568862271145038 | 33.51 |
| TCGA-AF-3911 | 106 | relapsed | 0.74974579100965   | 33.51 |
| TCGA-F4-6808 | 105 | censored | 0.74974579100965   | 33.64 |
| TCGA-AA-3548 | 104 | censored | 0.74974579100965   | 33.97 |
| TCGA-AA-3956 | 103 | censored | 0.74974579100965   | 34    |
| TCGA-AA-3531 | 102 | censored | 0.74974579100965   | 34    |
| TCGA-AG-3593 | 101 | censored | 0.74974579100965   | 34    |
| TCGA-AG-3592 | 100 | censored | 0.74974579100965   | 34    |
| TCGA-AA-A00F | 99  | censored | 0.74974579100965   | 34    |
| TCGA-AA-3975 | 98  | censored | 0.74974579100965   | 34.03 |
| TCGA-G5-6235 | 97  | relapsed | 0.7420164529580041 | 34.23 |
| TCGA-AF-3400 | 96  | censored | 0.7420164529580041 | 34.46 |
| TCGA-A6-3807 | 95  | censored | 0.7420164529580041 | 34.63 |
| TCGA-AG-3887 | 94  | relapsed | 0.7341226609052595 | 34.95 |
| TCGA-AA-A010 | 93  | censored | 0.7341226609052595 | 34.95 |
| TCGA-AG-3893 | 92  | censored | 0.7341226609052595 | 34.99 |
| TCGA-A6-2680 | 91  | censored | 0.7341226609052595 | 35.09 |
| TCGA-F4-6463 | 90  | censored | 0.7341226609052595 | 35.71 |
| TCGA-G4-6586 | 89  | censored | 0.7341226609052595 | 35.78 |
| TCGA-AG-4001 | 88  | censored | 0.7341226609052595 | 36.01 |
| TCGA-AA-3524 | 87  | censored | 0.7341226609052595 | 36.01 |
| TCGA-AA-3854 | 86  | censored | 0.7341226609052595 | 36.01 |
| TCGA-F5-6812 | 85  | censored | 0.7341226609052595 | 36.47 |
| TCGA-A6-3810 | 84  | censored | 0.7341226609052595 | 36.5  |
| TCGA-AA-3841 | 83  | censored | 0.7341226609052595 | 36.93 |
| TCGA-CM-4746 | 82  | censored | 0.7341226609052595 | 36.99 |
| TCGA-AG-A011 | 81  | censored | 0.7341226609052595 | 36.99 |
| TCGA-AG-3731 | 80  | censored | 0.7341226609052595 | 36.99 |
| TCGA-AA-A01Z | 79  | relapsed | 0.7248299689950664 | 36.99 |
| TCGA-AA-3522 | 78  | censored | 0.7248299689950664 | 37.02 |
| TCGA-AA-3495 | 77  | censored | 0.7248299689950664 | 37.02 |
| TCGA-AF-2689 | 76  | relapsed | 0.7152927325609207 | 37.25 |
| TCGA-A6-2681 | 75  | relapsed | 0.7057554961267751 | 37.78 |
| TCGA-AF-2693 | 74  | censored | 0.7057554961267751 | 37.94 |
| TCGA-AA-A00L | 73  | censored | 0.7057554961267751 | 38.01 |
| TCGA-AA-A00A | 72  | censored | 0.7057554961267751 | 38.01 |
| TCGA-F5-6861 | 71  | censored | 0.7057554961267751 | 38.11 |
| TCGA-AH-6544 | 70  | censored | 0.7057554961267751 | 38.53 |
| TCGA-AA-3837 | 69  | censored | 0.7057554961267751 | 38.96 |
| TCGA-G4-6311 | 68  | censored | 0.7057554961267751 | 39.39 |
| TCGA-A6-2671 | 67  | relapsed | 0.6952218320054799 | 39.91 |
| TCGA-AA-3972 | 66  | relapsed | 0.6846881678841847 | 39.95 |
| TCGA-AG-3587 | 65  | relapsed | 0.6741545037628897 | 39.95 |
| TCGA-AA-A02Y | 64  | censored | 0.6741545037628897 | 39.95 |
| TCGA-AA-A02F | 63  | censored | 0.6741545037628897 | 39.95 |
| TCGA-AF-A56K | 62  | relapsed | 0.6632810440247785 | 39.98 |
| TCGA-A6-2674 | 61  | relapsed | 0.6524075842866673 | 40.05 |
| TCGA-AA-A03J | 60  | censored | 0.6524075842866673 | 40.93 |
| TCGA-AG-A02X | 59  | censored | 0.6524075842866673 | 40.97 |
| TCGA-AA-A00Q | 58  | censored | 0.6524075842866673 | 41.98 |
| TCGA-A6-2678 | 57  | censored | 0.6524075842866673 | 42.25 |
| TCGA-QG-A5YV | 56  | censored | 0.6524075842866673 | 42.74 |
| TCGA-AF-2691 | 55  | censored | 0.6524075842866673 | 43    |
| TCGA-F4-6807 | 54  | censored | 0.6524075842866673 | 43    |
| TCGA-A6-2675 | 53  | censored | 0.6524075842866673 | 43.4  |

|              |    |          |                    |        |
|--------------|----|----------|--------------------|--------|
| TCGA-A6-2675 | 53 | censored | 0.6524075842866673 | 43.4   |
| TCGA-DC-6160 | 52 | censored | 0.6524075842866673 | 43.99  |
| TCGA-G4-6306 | 51 | censored | 0.6524075842866673 | 44.65  |
| TCGA-CI-6622 | 50 | censored | 0.6524075842866673 | 44.74  |
| TCGA-A6-2679 | 49 | censored | 0.6524075842866673 | 44.88  |
| TCGA-AG-4022 | 48 | censored | 0.6524075842866673 | 45.99  |
| TCGA-A6-2672 | 47 | censored | 0.6524075842866673 | 46.62  |
| TCGA-AA-3678 | 46 | censored | 0.6524075842866673 | 46.98  |
| TCGA-CI-6623 | 45 | censored | 0.6524075842866673 | 47.4   |
| TCGA-AG-3898 | 44 | censored | 0.6524075842866673 | 48     |
| TCGA-CI-6624 | 43 | censored | 0.6524075842866673 | 48.16  |
| TCGA-F5-6465 | 42 | censored | 0.6524075842866673 | 49.47  |
| TCGA-AD-6889 | 41 | relapsed | 0.6364952041821145 | 49.8   |
| TCGA-AG-A025 | 40 | censored | 0.6364952041821145 | 49.93  |
| TCGA-AG-3598 | 39 | censored | 0.6364952041821145 | 50     |
| TCGA-AA-3673 | 38 | censored | 0.6364952041821145 | 50     |
| TCGA-CK-5913 | 37 | censored | 0.6364952041821145 | 51.28  |
| TCGA-DC-6157 | 36 | censored | 0.6364952041821145 | 51.94  |
| TCGA-AA-A029 | 35 | censored | 0.6364952041821145 | 51.94  |
| TCGA-AA-3864 | 34 | censored | 0.6364952041821145 | 52.96  |
| TCGA-AA-3664 | 33 | censored | 0.6364952041821145 | 53.98  |
| TCGA-G4-6307 | 32 | censored | 0.6364952041821145 | 54.99  |
| TCGA-A6-A56B | 31 | relapsed | 0.6159631008214012 | 55.12  |
| TCGA-D5-5541 | 30 | censored | 0.6159631008214012 | 55.88  |
| TCGA-D5-5540 | 29 | censored | 0.6159631008214012 | 56.04  |
| TCGA-AA-3506 | 28 | censored | 0.6159631008214012 | 57.98  |
| TCGA-AZ-4315 | 27 | censored | 0.6159631008214012 | 58.34  |
| TCGA-AA-3655 | 26 | censored | 0.6159631008214012 | 60.97  |
| TCGA-G4-6315 | 25 | censored | 0.6159631008214012 | 61.86  |
| TCGA-AG-A02N | 24 | censored | 0.6159631008214012 | 61.93  |
| TCGA-AA-3510 | 23 | censored | 0.6159631008214012 | 63.93  |
| TCGA-AF-A56L | 22 | censored | 0.6159631008214012 | 65.93  |
| TCGA-AZ-6601 | 21 | relapsed | 0.5866315245918106 | 74.57  |
| TCGA-AZ-4313 | 20 | censored | 0.5866315245918106 | 75.89  |
| TCGA-G4-6297 | 19 | relapsed | 0.5557561811922416 | 78.65  |
| TCGA-G4-6628 | 18 | censored | 0.5557561811922416 | 79.63  |
| TCGA-CK-6747 | 17 | censored | 0.5557561811922416 | 82.88  |
| TCGA-G4-6625 | 16 | relapsed | 0.5210214198677264 | 84.23  |
| TCGA-AA-3697 | 15 | censored | 0.5210214198677264 | 84.99  |
| TCGA-CK-4950 | 14 | censored | 0.5210214198677264 | 85.38  |
| TCGA-AZ-5407 | 13 | censored | 0.5210214198677264 | 88.14  |
| TCGA-DM-A28M | 12 | censored | 0.5210214198677264 | 95.11  |
| TCGA-AZ-4681 | 11 | censored | 0.5210214198677264 | 106.67 |
| TCGA-AZ-4308 | 10 | censored | 0.5210214198677264 | 109.2  |
| TCGA-AG-A036 | 9  | censored | 0.5210214198677264 | 117.02 |
| TCGA-DM-A0X9 | 8  | censored | 0.5210214198677264 | 119.61 |
| TCGA-DM-A28E | 7  | censored | 0.5210214198677264 | 119.84 |
| TCGA-CK-6751 | 6  | censored | 0.5210214198677264 | 124.18 |
| TCGA-DY-A0XA | 5  | censored | 0.5210214198677264 | 126.35 |
| TCGA-DM-A1D0 | 4  | censored | 0.5210214198677264 | 130.55 |
| TCGA-G4-6293 | 3  | censored | 0.5210214198677264 | 133.08 |
| TCGA-DM-A282 | 2  | censored | 0.5210214198677264 | 139.06 |
| TCGA-CK-4948 | 1  | censored | 0.5210214198677264 | 147.9  |

</pre></body></html>
